# Supplementary material for: Solvothermal synthesis of KBi3F10:Eu3+ phosphors as selective three-in-one fluorescent probes for Cr3+, CrO42− and Cr2O72− ion detection
Source: Royal Society of Chemistry journal article supplement (doi:10.1039/d4ce00297k), 2024-01-01
Supplement: d4ce00297k1.pdf [file d4ce00297k1.pdf]

## Supporting Information

### Solvothermal synthesis of $\text{KBi}_3\text{F}_{10}:\text{Eu}^{3+}$ phosphors as a selective three-in-one fluorescent probe for $\text{Cr}^{3+}$ , $\text{CrO}_4^{2-}$ and $\text{Cr}_2\text{O}_7^{2-}$ ions detection

Meifang Liu,<sup>a#</sup> Yue Jiang,<sup>b#</sup> Huimin Du,<sup>a</sup> Ziwei Zou,<sup>c</sup> Mengtan Ye,<sup>c</sup> Jingyu Chen,<sup>c</sup> Hanying Ren,<sup>c</sup> Jun Yang<sup>\*a</sup> and Shanshan Hu<sup>\*a</sup>

<sup>a</sup>School of Chemistry and Chemical Engineering, Southwest University, No. 2 Tiansheng Road, Beibei District, Chongqing 400715, China.

<sup>b</sup>Chongqing Nan'an District Ecological Environment Monitoring Station, No. 5 Changdian Road, Nan'an District, Chongqing 401336, China.

<sup>c</sup>Chongqing No. 8 Secondary School, No. 96 Xiaolongkangzheng Street, Shapingba District, Chongqing 400030, China.

E-mail: [jyang@swu.edu.cn](mailto:jyang@swu.edu.cn), [hushan3@swu.edu.cn](mailto:hushan3@swu.edu.cn)

<sup>#</sup>These authors contributed equally to this work.

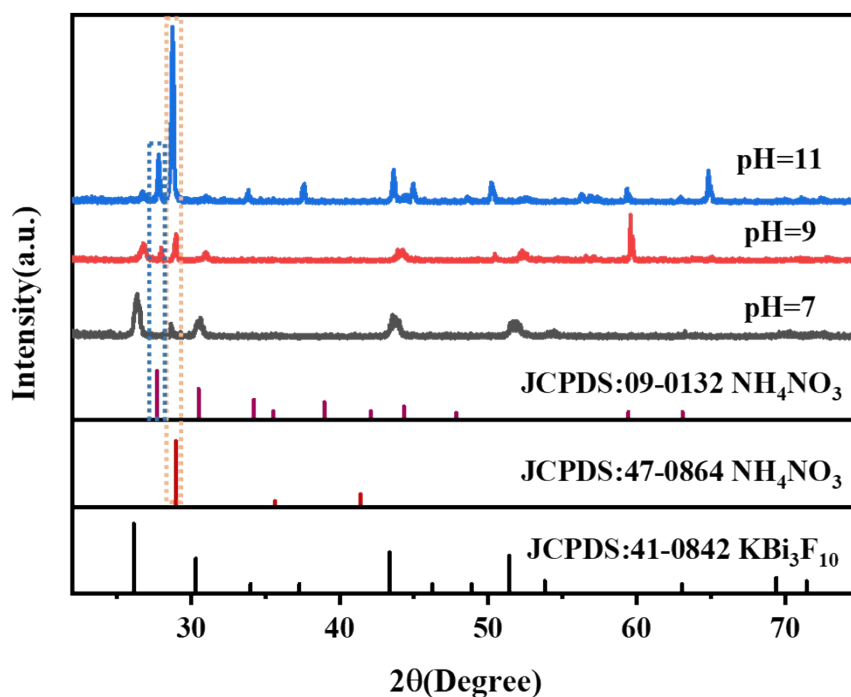

Fig S1. XRD patterns of  $\text{KBi}_3\text{F}_{10}:\text{Eu}^{3+}$  synthesized at different pH

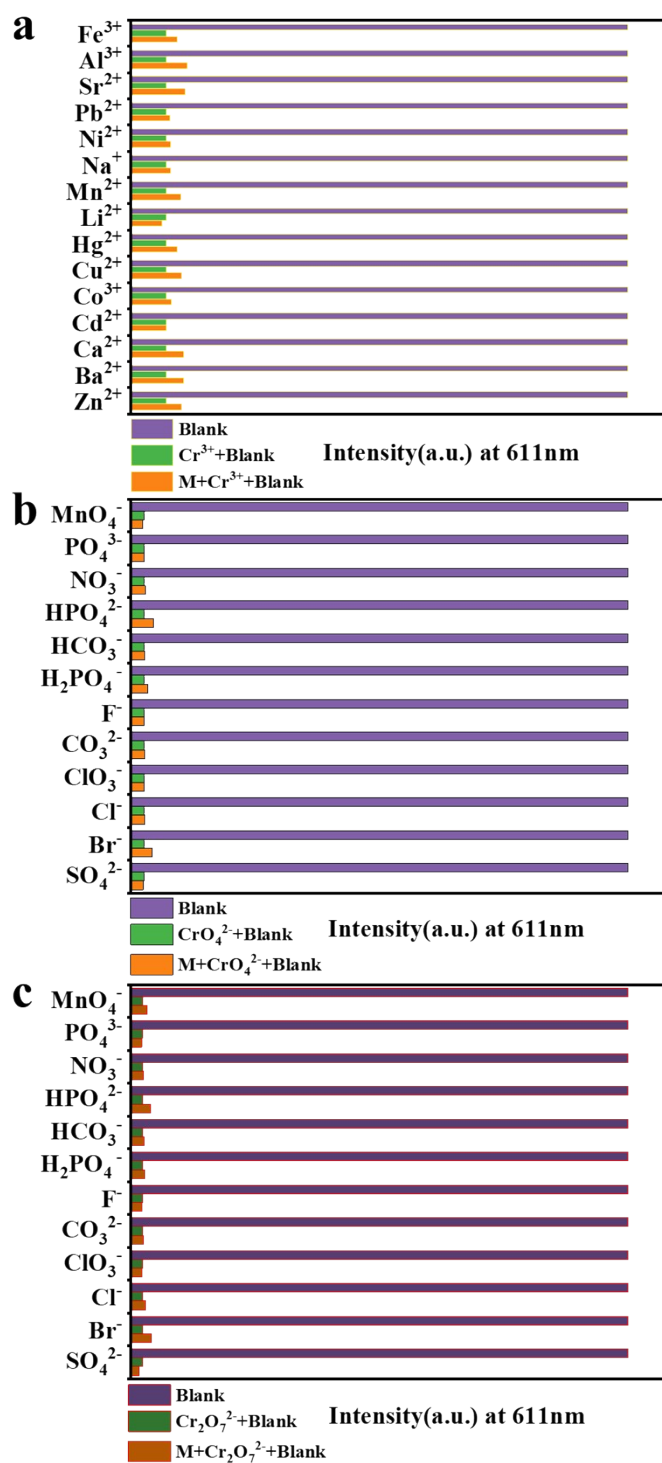

Fig S2. Relative luminescence intensity of  $\text{KBi}_3\text{F}_{10}:12\%\text{Eu}^{3+}$  suspension at 611 nm after addition of detection and interfering ions.

Table S1 LOD values of some published ion detection probes

| <b>Author</b> | <b>Probe</b>                      | <b>Detection ions</b>                        | <b>LOD</b> |
|---------------|-----------------------------------|----------------------------------------------|------------|
| Li et al.     | YF <sub>3</sub> :Eu <sup>3+</sup> | Cr <sup>3+</sup>                             | 1.88 μM    |
|               |                                   | Cr <sub>2</sub> O <sub>7</sub> <sup>2-</sup> | 1.34 μM    |
| Guo et al.    | two-dimensional                   | Cr <sup>3+</sup>                             | 2.44 μM    |
|               | Zn(II) organic                    | CrO <sub>4</sub> <sup>2-</sup>               | 4.8 μM     |
|               | skeleton                          | Cr <sub>2</sub> O <sub>7</sub> <sup>2-</sup> | 3.53 μM    |
| Huang et al.  | 1α-DMF                            | CrO <sub>4</sub> <sup>2-</sup>               | 2.29 μM    |
|               | 1β-DMAc                           | Cr <sub>2</sub> O <sub>7</sub> <sup>2-</sup> | 0.94 μM    |
| Zhou et al.   | Cu <sub>2</sub> I <sub>2</sub>    | CrO <sub>4</sub> <sup>2-</sup>               | 74.5 μM    |
|               | Cu <sub>6</sub> S <sub>6</sub>    | Cr <sub>2</sub> O <sub>7</sub> <sup>2-</sup> | 24 μM      |
| Song et al.   | Zn-organic                        | CrO <sub>4</sub> <sup>2-</sup>               | 4 μM       |
|               | frameworks                        | Cr <sub>2</sub> O <sub>7</sub> <sup>2-</sup> | 1 μM       |

Table S2 Control standards for Cr content in drinking water sources by some countries and international organizations

| <b>Standard</b>  | <b>Cr(μg/L)</b> |
|------------------|-----------------|
| U.S.EPA,2009     | 100             |
| WHO,2008         | 50              |
| GB3838-2002(III) | 50              |
| GB 5749-2022     | 50              |
